# Supplementary material for: Effect of Fractionation and Processing Conditions on the Digestibility of Plant Proteins as Food Ingredients
Source: MDPI journal article supplement (doi:10.3390/foods11060870), 2022-03-18
Supplement: s1 [file s1]

## Effect of fractionation and processing conditions on the digestibility of plant proteins as food ingredients

Andrea Rivera del Rio, Remko M. Boom and Anja E.M. Janssen

**Table S1.** Summary of digestion assays, sample treatment and measurement from studies investigating the effect of processing on protein digestion.

| Crop                         | Digestion assay<br>gastric | small intestinal             | Digestion sample treatment/measurement                                                     | Effect                                                       | Reference                        |
|------------------------------|----------------------------|------------------------------|--------------------------------------------------------------------------------------------|--------------------------------------------------------------|----------------------------------|
| Pre-fractionation treatments |                            |                              |                                                                                            |                                                              |                                  |
| High temperature soaking     |                            |                              |                                                                                            |                                                              |                                  |
| soybean                      | 3 h                        | N/A                          | TCA-soluble nitrogen                                                                       | <b>h</b>                                                     | Wally-Vallim, <i>et al.</i> [1]  |
| cowpea                       | 2 h                        | 2 h pancreatin               | supernatant, ultrafiltered protein cutoff 3 kDa<br>TCA-soluble nitrogen defined as DH      | <b>h</b>                                                     | Marques, <i>et al.</i> [2]       |
| Germination                  |                            |                              |                                                                                            |                                                              |                                  |
| soybean                      | 2 h                        | 24 h trypsin                 | TCA-soluble nitrogen                                                                       | <b>h</b>                                                     | Dikshit and Ghadle [3]           |
| black bean                   | 1 h                        | 2 h pancreatin               | supernatant<br>DH by ninhydrin reaction<br>Samples digested for 24 h considered as 100% DH | <b>h</b>                                                     | López-Barrios, <i>et al.</i> [4] |
| soybean                      | N/A                        | trypsin (time not specified) | DH by OPA reaction                                                                         | <b>hi</b>                                                    | Aijie, <i>et al.</i> [5]         |
| black soybean                | 30 min                     | 30 min pancreatin            | supernatant: molecular weight distribution                                                 | lower proportion of <0.15 kDa peptides in germinated samples | Sefatie, <i>et al.</i> [6]       |
| Fermentation                 |                            |                              |                                                                                            |                                                              |                                  |
| lupin                        | N/A                        | 10 min trypsin, $\alpha$ -   | pH drop                                                                                    | <b>h</b>                                                     | Bartkiene, <i>et al.</i> [7]     |

|                                             |                          |                                                      |                                                     |                                |                                         |
|---------------------------------------------|--------------------------|------------------------------------------------------|-----------------------------------------------------|--------------------------------|-----------------------------------------|
| chymotrypsin<br>and serine-type<br>protease |                          |                                                      |                                                     |                                |                                         |
| Conventional protein fractionation          |                          |                                                      |                                                     |                                |                                         |
| soybean                                     | <i>in vivo</i> rat assay |                                                      | PDCAAS                                              | =                              | Hughes, <i>et al.</i> [8]               |
| soybean                                     | <i>in vivo</i> pig assay |                                                      | Standard ileal digestibility                        | =                              | Pedersen, <i>et al.</i> [9]             |
| soybean                                     | 3 h                      | N/A                                                  | TCA-soluble nitrogen                                | =                              | Da Silva Pinto, <i>et al.</i> [10]      |
| Alkaline treatment                          |                          |                                                      |                                                     |                                |                                         |
| rice                                        | 2 h                      | 2 h trypsin<br>and <i>in vivo</i> rat assay          | TCA-soluble nitrogen and absorption                 | i                              | Zhang, <i>et al.</i> [11]               |
| lupin                                       | N/A                      | up to 28 h trypsin and chymotrypsin                  | TCA-soluble nitrogen                                | i                              | Yu, <i>et al.</i> [12]                  |
| quinoa                                      | 6 h                      | N/A                                                  | DH by OPA reaction<br>Size-exclusion chromatography | i                              | Ruiz, <i>et al.</i> [13]                |
| Alternative protein fractionation           |                          |                                                      |                                                     |                                |                                         |
| 'alternative' chemicals                     |                          |                                                      |                                                     |                                |                                         |
| soybean                                     | 2 h                      | 24 h pancreatin                                      | TCA-soluble nitrogen                                | =                              | Chamba, <i>et al.</i> [14]              |
| lupin                                       | N/A                      | 10 min trypsin, chymotrypsin and peptidase           | pH drop                                             | <b>h</b>                       | Lqari, <i>et al.</i> [15]               |
| chickpea                                    | N/A                      | 10 min trypsin, $\alpha$ -chymotrypsin and peptidase | pH drop                                             | =                              | Sánchez-Vioque, <i>et al.</i> [16]      |
| brown lentil                                | 1 h                      | 24 h pancreatin                                      | Free amino groups by TNBS reaction                  | =                              | Joehnke, <i>et al.</i> [17]             |
| alternative drying methods                  |                          |                                                      |                                                     |                                |                                         |
| hempseed                                    | N/A                      | 10 min trypsin, $\alpha$ -chymotrypsin and protease  | pH drop                                             | freeze>oven>vacuum oven drying | Lin, <i>et al.</i> [18]                 |
| buckwheat                                   | 2 h                      | 2 h trypsin                                          | TCA-soluble nitrogen release and SDS-PAGE           | freeze>spray drying            | Tang [19]                               |
| enzyme assisted fractionation               |                          |                                                      |                                                     |                                |                                         |
| soybean                                     | (not specified)          | N/A                                                  | nitrogen solubility                                 | =                              | De Almeida, <i>et al.</i> [20]          |
| white sorghum                               | 2 h                      | N/A                                                  | nitrogen solubility                                 | =                              | De Mesa-Stonestreet, <i>et al.</i> [21] |
| air classification                          |                          |                                                      |                                                     |                                |                                         |

|                                |        |                                                                                      |                                                     |                                    |                                       |
|--------------------------------|--------|--------------------------------------------------------------------------------------|-----------------------------------------------------|------------------------------------|---------------------------------------|
| pea, fava bean and lentil      |        | <i>in vivo</i> mouse assay                                                           | protein digestibility                               | i                                  | Bhatty and Christison [22]            |
| fava bean                      | 1 h    | 24 h pancreatin                                                                      | Free amino groups by TNBS reaction                  | i                                  | Vogelsang-O'Dwyer, <i>et al.</i> [23] |
| quinoa                         | 6 h    | N/A                                                                                  | DH by OPA reaction<br>Size-exclusion chromatography | <b>h</b>                           | Opazo-Navarrete, <i>et al.</i> [24]   |
| Post-fractionation processing  |        |                                                                                      |                                                     |                                    |                                       |
| Fermentation                   |        |                                                                                      |                                                     |                                    |                                       |
| yellow pea                     | N/A    | 10 min trypsin, $\alpha$ -chymotrypsin and protease                                  | pH drop<br>in vitro PDCAAS                          | <b>h</b><br>(lower IVPDCAAS)       | Çabuk, <i>et al.</i> [25]             |
| soybean                        |        | soft rat gastrointestinal model with dynamic gastric and duodenal (pancreatin) parts | TCA-soluble free-amino acids                        | <b>h</b>                           | Huang, <i>et al.</i> [26]             |
| Ultrasound                     |        |                                                                                      |                                                     |                                    |                                       |
| fava bean                      | N/A    | 10 min trypsin, $\alpha$ -chymotrypsin and peptidase                                 | pH drop                                             | i                                  | Martínez-Velasco, <i>et al.</i> [27]  |
| Proteolysis                    |        |                                                                                      |                                                     |                                    |                                       |
| soybean                        | 30 min | 30 min chymotrypsin (non-sequential)                                                 | TCA-soluble nitrogen                                | <b>h</b>                           | Ge and Zhang [28]                     |
| soybean                        | N/A    | 2 h trypsin and $\alpha$ -chymotrypsin                                               | pH drop and free amino groups by ninhydrin reaction | =                                  | Nguyen, <i>et al.</i> [29]            |
| soybean and zein               | 30 min | 2 h pancreatin                                                                       | Tricine-SDS PAGE                                    | = soy, <b>h</b> zein               | Kaur, <i>et al.</i> [30]              |
| soybean, wheat gluten and zein |        | <i>in vivo</i> rat assay                                                             | true ileal digestibility                            | = soy, wheat gluten, <b>h</b> zein | Rutherford, <i>et al.</i> [31]        |
| soybean                        |        | <i>in vivo</i> rat assay                                                             | true gastric total protein digestion                | <b>h</b>                           | Montoya, <i>et al.</i> [32]           |
| green lentil                   | N/A    | 10 min trypsin, $\alpha$ -chymotrypsin and peptidase                                 | pH drop and size-exclusion chromatography           | i                                  | Aryee and Boye [33]                   |
| rapeseed                       |        | <i>in vivo</i> rat assay<br><i>in vivo</i> human assay                               | true digestibility<br>PDCAAS                        | <b>h</b>                           | Fleddermann, <i>et al.</i> [34]       |
| rice bran                      | 2 h    | 2 h pancreatin<br>10 min trypsin, $\alpha$ -chymotrypsin and peptidase               | TCA-soluble nitrogen                                | <b>h</b>                           | Singh, <i>et al.</i> [35]             |
| chickpea                       | N/A    |                                                                                      | pH drop                                             | =                                  | Clemente, <i>et al.</i> [36]          |

|                                         |        |                                                              |                                                      |                                                                |                                     |
|-----------------------------------------|--------|--------------------------------------------------------------|------------------------------------------------------|----------------------------------------------------------------|-------------------------------------|
| chickpea                                | N/A    | 11 min trypsin,<br>$\alpha$ -chymotrypsin and protease       | pH drop                                              | =                                                              | Goertzen, <i>et al.</i> [37]        |
| Heat treatment                          |        |                                                              |                                                      |                                                                |                                     |
| soybean                                 | 1 h    | N/A                                                          | DH by OPA reaction                                   | <b>hi</b>                                                      | Tian, <i>et al.</i> [38]            |
| soybean                                 | 1 h    | 3 h pancreatin                                               | TCA-soluble nitrogen and SDS PAGE                    | <b>h</b>                                                       | Chen, <i>et al.</i> [39]            |
| soybean                                 | 1 h    | 2 h trypsin                                                  | DH by OPA reaction                                   | <b>h</b>                                                       | Ren, <i>et al.</i> [40]             |
| soybean                                 |        | Infogest 1.0                                                 | TCA-soluble nitrogen                                 | <b>h</b>                                                       | Zhang, <i>et al.</i> [41]           |
| soybean                                 |        | <i>in vivo</i> rat assay                                     | Apparent digestibility from faeces                   | <b>i</b>                                                       | Kim and Barbeau [42]                |
| lupin                                   | N/A    | 10 min trypsin,<br>$\alpha$ -chymotrypsin and peptidase      | pH drop                                              | <b>h</b>                                                       | Sathe, <i>et al.</i> [43]           |
| winged bean                             | N/A    | 10 min trypsin,<br>$\alpha$ -chymotrypsin and peptidase      | pH drop                                              | <b>h</b>                                                       | Sathe, <i>et al.</i> [44]           |
| red bean, red kidney bean and mung bean | 2 h    | 2 h trypsin                                                  | TCA-soluble nitrogen                                 | <b>i</b> red bean,<br>= red kidney bean<br><b>hi</b> mung bean | Tang, <i>et al.</i> [45]            |
| soybean and pea                         | 2 h    | N/A                                                          | DH by OPA reaction and size-exclusion chromatography | =                                                              | Rivera del Rio, <i>et al.</i> [46]  |
| quinoa                                  | 6 h    | N/A                                                          | DH by OPA reaction and size-exclusion chromatography | <b>i</b>                                                       | Opazo-Navarrete, <i>et al.</i> [47] |
| lupin                                   | 30 min | N/A                                                          | <3 kDa peptides from size-exclusion chromatography   | = <b>i</b>                                                     | Pelgrom, <i>et al.</i> [48]         |
| navy bean                               | N/A    | 24 h trypsin, $\alpha$ -chymotrypsin and peptidase           | DH by TNBS reaction                                  | <b>h</b>                                                       | Sathe, <i>et al.</i> [49]           |
| sweet potato                            |        | <i>in vivo</i> rat assay                                     | PDCAAS                                               | <b>h</b><br>autoclaved><br>microwaved><br>dry<br>heated>native | Sun, <i>et al.</i> [50]             |
| lentil                                  | N/A    | 2 h trypsin and chymotrypsin<br>2 h trypsin and chymotrypsin | DH by TNBS reaction                                  | <b>h</b>                                                       | Neves and Lourenço [51]             |
| chickpea                                | 2 h    | or 10 min trypsin, chymotrypsin and peptidase                | DH by TNBS reaction and pH drop                      | <b>h</b>                                                       | Tavano and Neves [52]               |
| white common bean                       |        | <i>in vivo</i> rat assay                                     | absorption or protein intestinal digestibility       | <b>i</b>                                                       | Carbonaro, <i>et al.</i> [53]       |

|                                           |                                     |                                                       |                                               |    |                                |
|-------------------------------------------|-------------------------------------|-------------------------------------------------------|-----------------------------------------------|----|--------------------------------|
| and fava bean                             |                                     |                                                       |                                               |    |                                |
| navy bean                                 |                                     | not specified                                         | " <i>in vitro</i> protein digestibility"      | hi | Chang and Satterlee [54]       |
| soybean                                   | N/A                                 | 10 min trypsin, $\alpha$ -chymotrypsin and peptidase  | pH drop                                       | i  | Wu, <i>et al.</i> [55]         |
| soybean and rapeseed                      | 30 min                              | pancreatin and diffusion through a 1000 MWCO membrane | nitrogen and amino acid release in dialysates | i  | Savoie, <i>et al.</i> [56]     |
| soybean                                   |                                     | <i>in vivo</i> rat assay                              | true protein digestibility                    | i  | Sarwar, <i>et al.</i> [57]     |
| High pressure processing                  |                                     |                                                       |                                               |    |                                |
| yellow pea                                |                                     | Infogest 1.0                                          | SDS PAGE and pH stat                          | h  | Laguna, <i>et al.</i> [58]     |
| Modifications                             |                                     |                                                       |                                               |    |                                |
| Transglutaminase-catalysed polymerization |                                     |                                                       |                                               |    |                                |
| red kidney bean                           | N/A                                 | 2 h trypsin                                           | TCA-soluble nitrogen                          | i  | Yin, <i>et al.</i> [59]        |
| <i>Phaseolus vulgaris</i> L. bean         | 1 h                                 | 1 h trypsin (non-sequential)                          | SDS PAGE                                      | i  | Mariniello, <i>et al.</i> [60] |
| soybean                                   | 2 h                                 | 2 h trypsin                                           | TCA-soluble nitrogen                          | i  | Tang, <i>et al.</i> [61]       |
| red kidney bean                           | N/A                                 | 2 h trypsin                                           | TCA-soluble nitrogen                          | h  | Tang, <i>et al.</i> [62]       |
| soybean                                   | 1 h                                 | 3 h pancreatin                                        | SDS PAGE                                      | i  | Li and Damodaran [63]          |
| soybean                                   | 2 h or 1 h for sequential digestion | 1 h trypsin                                           | TCA-soluble nitrogen                          | i  | Sheng and Zhao [64]            |
| soybean                                   | time not specified                  | trypsin (time not specified)                          | TCA-soluble nitrogen                          | h  | Fu and Zhao [65]               |
| soybean                                   | 2 h or 1 h for sequential digestion | 1 h trypsin                                           | TCA-soluble nitrogen                          | h  | Zhu, <i>et al.</i> [66]        |
| soybean                                   | N/A                                 | 10 min trypsin, $\alpha$ -chymotrypsin and peptidase  | pH drop                                       | i  | Gan, <i>et al.</i> [67]        |
| Acylation                                 |                                     |                                                       |                                               |    |                                |
| red kidney bean                           | N/A                                 | 2 h trypsin                                           | TCA-soluble nitrogen                          | h  | Yin, <i>et al.</i> [68]        |
| mung bean                                 | N/A                                 | trypsin and pancreatin                                | pH stat                                       | h  | El-Adawy [69]                  |

|                                      |                          |                                                                              |                                                                            |                        |                                        |
|--------------------------------------|--------------------------|------------------------------------------------------------------------------|----------------------------------------------------------------------------|------------------------|----------------------------------------|
| soybean                              | N/A                      | (time not specified)<br>10 min trypsin, $\alpha$ -chymotrypsin and peptidase | pH drop                                                                    | <b>h</b>               | Achouri and Zhang [70]                 |
| soybean                              | <i>in vivo</i> rat assay |                                                                              | protein efficiency ratio                                                   | <b>h =</b>             | de Regil and Calderón de la Barca [71] |
| Complexation with phenolic compounds |                          |                                                                              |                                                                            |                        |                                        |
| soybean                              | 2 h                      | 24 h trypsin and chymotrypsin                                                | size exclusion chromatography                                              | =                      | Budryn, <i>et al.</i> [72]             |
| soybean                              | time not specified       | trypsin and chymotrypsin (time not specified)                                | TCA-soluble nitrogen                                                       | i                      | Rohn, <i>et al.</i> [73]               |
|                                      | <i>in vivo</i> rat assay |                                                                              | nitrogen efficiency<br>true nitrogen digestibility<br>PDCAAS               |                        |                                        |
| yellow pea                           | 3 h                      | 4 h pancreatin                                                               | Free amino groups by TNBS reaction                                         | i                      | Strauch and Lila [74]                  |
| soybean                              | 1 h                      | 2 h trypsin                                                                  | SDS PAGE                                                                   | i                      | Yang, <i>et al.</i> [75]               |
| Other modifications                  |                          |                                                                              |                                                                            |                        |                                        |
| soybean                              | 1 h                      | 2 h pancreatin                                                               | SDS PAGE and free amino acids                                              | i                      | Chen, <i>et al.</i> [76]               |
| soybean, cottonseed and peanut       | N/A                      | 10 min trypsin, $\alpha$ -chymotrypsin and peptidase                         | pH drop                                                                    | i                      | Rhee and Rhee [77]                     |
| soybean                              | 2 h                      | 2 h pancreatin                                                               | TCA-soluble nitrogen                                                       | <b>h</b>               | Wang, <i>et al.</i> [78]               |
| Protein oxidation                    |                          |                                                                              |                                                                            |                        |                                        |
| soybean                              | Infogest 1.0             | N/A                                                                          | DH by OPA reaction                                                         | <b>hi</b>              | Zhao, <i>et al.</i> [79]               |
| soybean                              | 1 h                      | 2 h pancreatin                                                               | SDS PAGE                                                                   | i                      | Chen, <i>et al.</i> [80]               |
| soybean                              | 3 h                      | N/A                                                                          | DH by OPA reaction                                                         | =                      | Duque-Estrada, <i>et al.</i> [81]      |
| Structure formation                  |                          |                                                                              |                                                                            |                        |                                        |
| Gelling                              |                          |                                                                              |                                                                            |                        |                                        |
| soybean and yellow pea               | 3 h                      | N/A                                                                          | DH by OPA reaction and size-exclusion chromatography                       | i soybean = yellow pea | Opazo-Navarrete, <i>et al.</i> [82]    |
| lentil and fava bean                 |                          | Infogest 1.0                                                                 | ultrafiltration through 50 kDa, 30 kDa, and 10 kDa Mw cut-offs<br>SDS PAGE | =                      | Hall and Moraru [83]                   |
| soybean                              | 1 h                      | 2 h pancreatin                                                               | pH stat                                                                    | <b>h</b>               | Rui, <i>et al.</i> [84]                |
| soybean                              | 2 h                      | N/A                                                                          | TCA-soluble nitrogen                                                       | i                      | Ou, <i>et al.</i> [85]                 |
| Extrusion and texturization          |                          |                                                                              |                                                                            |                        |                                        |

|                              |              |                                                      |                                                                            |          |                                    |
|------------------------------|--------------|------------------------------------------------------|----------------------------------------------------------------------------|----------|------------------------------------|
| soybean                      | N/A          | 10 min trypsin, $\alpha$ -chymotrypsin and peptidase | pH drop                                                                    | <b>h</b> | Omosebi, <i>et al.</i> [86]        |
| yellow pea                   | N/A          | 10 min trypsin, $\alpha$ -chymotrypsin and peptidase | pH drop                                                                    | <b>h</b> | Wang, <i>et al.</i> [87]           |
| rice                         | 1 h          | 2 h pancreatin                                       | fluorescence spectral analysis                                             | i        | Li, <i>et al.</i> [88]             |
| Intragastic gelling          |              |                                                      |                                                                            |          |                                    |
| soybean                      | 2 h          | N/A                                                  | SDS PAGE of aqueous phase                                                  | (        | Hu, <i>et al.</i> [89]             |
| soybean                      | Infogest 1.0 | N/A                                                  | SDS PAGE                                                                   | (        | Huang, <i>et al.</i> [90]          |
| Animal-plant hybrid foods    |              |                                                      |                                                                            |          |                                    |
| soybean, rice and yellow pea | 1 h          | 4 h trypsin and chymotrypsin                         | TCA-soluble nitrogen, amine content by ninhydrin reaction, in vitro PDCAAS | <b>h</b> | Khalesi and Fitzgerald [91]        |
| yellow pea, rice and lentil  |              | Infogest 2.0                                         | TCA-soluble free amino acids                                               | i        | Baugreet, <i>et al.</i> [92]       |
| Nutrient interactions        |              |                                                      |                                                                            |          |                                    |
| yellow pea                   | 2 h          | 2 h pancreatin                                       | SDS PAGE                                                                   | i        | Oñate Narciso and Brennan [93]     |
| chickpea                     | N/A          | 10 min trypsin, $\alpha$ -chymotrypsin and peptidase | pH drop                                                                    | i        | Sánchez-Vioque, <i>et al.</i> [94] |

DH, degree of hydrolysis; N/A, not applicable; OPA, o-phthalaldehyde; PDCAAS, protein digestibility-corrected amino acid score; SDS PAGE, sodium dodecyl sulphate–polyacrylamide gel electrophoresis; TCA, trichloroacetic acid; TNBS, trinitrobenzenesulfonic acid. The pH drop method normally refers to the method by Hsu, *et al.* [95].

## References

- Wally-Vallim, A.P.; Vanier, N.L.; da Rosa Zavareze, E.; Zambiasi, R.C.; de Castro, L.A.S.; Schirmer, M.A.; Elias, M.C. Isoflavone Aglycone Content and the Thermal, Functional, and Structural Properties of Soy Protein Isolates Prepared from Hydrothermally Treated Soybeans. *Journal of Food Science* **2014**, *79*, E1351–E1358, doi:10.1111/1750-3841.12506.
- Marques, M.R.; Soares Freitas, R.A.M.; Corrêa Carlos, A.C.; Siguemoto, É.S.; Fontanari, G.G.; Arêas, J.A.G. Peptides from cowpea present antioxidant activity, inhibit cholesterol synthesis and its solubilisation into micelles. *Food Chemistry* **2015**, *168*, 288–293, doi:10.1016/j.foodchem.2014.07.049.
- Dikshit, M.; Ghadle, M. Effect of sprouting on nutrients, antinutrients and in vitro digestibility of the MACS-13 soybean variety. *Plant Foods for Human Nutrition* **2003**, *58*, 1–11, doi:10.1023/B:QUAL.0000040357.70606.4c.
- López-Barrios, L.; Antunes-Ricardo, M.; Gutiérrez-Urbe, J.A. Changes in antioxidant and antiinflammatory activity of black bean (*Phaseolus vulgaris* L.) protein isolates due to germination and enzymatic digestion. *Food Chemistry* **2016**, *203*, 417–424, doi:10.1016/j.foodchem.2016.02.048.
- Aijie, L.; Shouwei, Y.; Li, L. Structure, trypsin inhibitor activity and functional properties of germinated soybean protein isolate. *International Journal of Food Science and Technology* **2014**, *49*, 911–919, doi:10.1111/ijfs.12386.
- Sefatie, R.S.; Fatoumata, T.; Eric, K.; Shi, Y.H.; Guo-Wei, L. In vitro antioxidant activities of protein hydrolysate from germinated black soybean (*Glycine max* L.). *Advance Journal of Food Science and Technology* **2013**, *5*, 453–459, doi:10.19026/ajfst.5.3290.

7. Bartkiene, E.; Sakiene, V.; Bartkevics, V.; Rusko, J.; Lele, V.; Juodeikiene, G.; Wiacek, C.; Braun, P.G. Lupinus angustifolius L. lactofermentation and protein isolation: effects on phenolic compounds and genistein, antioxidant properties, trypsin inhibitor activity, and protein digestibility. *European Food Research and Technology* **2018**, *244*, 1521-1531, doi:10.1007/s00217-018-3066-8.
8. Hughes, G.J.; Ryan, D.J.; Mukherjea, R.; Schasteen, C.S. Protein digestibility-corrected amino acid scores (PDCAAS) for soy protein isolates and concentrate: Criteria for evaluation. *Journal of Agricultural and Food Chemistry* **2011**, *59*, 12707-12712, doi:10.1021/jf203220v.
9. Pedersen, C.; Almeida, J.S.; Stein, H.H. Analysis of published data for standardized ileal digestibility of protein and amino acids in soy proteins fed to pigs. *Journal of Animal Science* **2016**, *94*, 340-343, doi:10.2527/jas2015-9864.
10. Da Silva Pinto, M.; Lajolo, F.M.; Genovese, M.I. Effect of storage temperature and water activity on the content and profile of isoflavones, antioxidant activity, and in vitro protein digestibility of soy protein isolates and defatted soy flours. *Journal of Agricultural and Food Chemistry* **2005**, *53*, 6340-6346, doi:10.1021/jf0502451.
11. Zhang, Z.; Wang, Y.; Li, Y.; Dai, C.; Ding, Q.; Hong, C.; He, Y.; He, R.; Ma, H. Effect of alkali concentration on digestibility and absorption characteristics of rice residue protein isolates and lysinoalanine. *Food Chemistry* **2019**, *289*, 609-615, doi:10.1016/j.foodchem.2019.03.085.
12. Yu, R.S.T.; Kyle, W.S.A.; Hung, T.V.; Zeckler, R. Characterisation of aqueous extracts of seed proteins of *Lupinus albus* and *Lupinus angustifolius*. *Journal of the Science of Food and Agriculture* **1987**, *41*, 205-218, doi:10.1002/jsfa.2740410303.
13. Ruiz, G.A.; Opazo-Navarrete, M.; Meurs, M.; Minor, M.; Sala, G.; van Boekel, M.; Stieger, M.; Janssen, A.E.M. Denaturation and in Vitro Gastric Digestion of Heat-Treated Quinoa Protein Isolates Obtained at Various Extraction pH. *Food Biophysics* **2016**, *11*, 184-197, doi:10.1007/s11483-016-9429-4.
14. Chamba, M.V.M.; Hua, Y.; Murekatete, N.; Chen, Y. Effects of synthetic and natural extraction chemicals on yield, composition and protein quality of soy protein isolates extracted from full-fat and defatted flours. *Journal of Food Science and Technology* **2013**, *52*, 1016-1023, doi:10.1007/s13197-013-1084-x.
15. Lqari, H.; Vioque, J.; Pedroche, J.; Millán, F. *Lupinus angustifolius* protein isolates: chemical composition, functional properties and protein characterization. *Food Chemistry* **2002**, *76*, 349-356, doi:10.1016/S0308-8146(01)00285-0.
16. Sánchez-Vioque, R.; Clemente, A.; Vioque, J.; Bautista, J.; Millán, F. Protein isolates from chickpea (*Cicer arietinum* L.): Chemical composition, functional properties and protein characterization. *Food Chemistry* **1999**, *64*, 237-243, doi:10.1016/S0308-8146(98)00133-2.
17. Joehne, M.S.; Jeske, S.; Ispiryan, L.; Zannini, E.; Arendt, E.K.; Bez, J.; Sørensen, J.C.; Petersen, I.L. Nutritional and anti-nutritional properties of lentil (*Lens culinaris*) protein isolates prepared by pilot-scale processing. *Food Chemistry: X* **2021**, *9*, doi:10.1016/j.fochx.2020.100112.
18. Lin, Y.; Pangloli, P.; Dia, V.P. Physicochemical, functional and bioactive properties of hempseed (*Cannabis sativa* L.) meal, a co-product of hempseed oil and protein production, as affected by drying process. *Food Chemistry* **2021**, *350*, doi:10.1016/j.foodchem.2021.129188.
19. Tang, C.H. Functional properties and in vitro digestibility of buckwheat protein products: Influence of processing. *Journal of Food Engineering* **2007**, *82*, 568-576, doi:10.1016/j.jfoodeng.2007.01.029.
20. De Almeida, N.M.; De Moura Bell, J.M.L.N.; Johnson, L.A. Properties of soy protein produced by countercurrent, two-stage, enzyme-assisted aqueous extraction. *JAOCs, Journal of the American Oil Chemists' Society* **2014**, *91*, 1077-1085, doi:10.1007/s11746-014-2436-z.
21. De Mesa-Stonestreet, N.J.; Alavi, S.; Gwartz, J. Extrusion-enzyme liquefaction as a method for producing sorghum protein concentrates. *Journal of Food Engineering* **2012**, *108*, 365-375, doi:10.1016/j.jfoodeng.2011.07.024.
22. Bhatti, R.S.; Christison, G.I. Composition and nutritional quality of pea (*Pisum sativum* L.), faba bean (*Vicia faba* L. spp. minor) and lentil (*Lens culinaris* Medik.) meals, protein concentrates and isolates. *Qualitas Plantarum Plant Foods for Human Nutrition* **1984**, *34*, 41-51, doi:10.1007/bf01095071.
23. Vogelsang-O'Dwyer, M.; Petersen, I.L.; Joehne, M.S.; Sørensen, J.C.; Bez, J.; Detzel, A.; Busch, M.; Krueger, M.; O'Mahony, J.A.; Arendt, E.K.; et al. Comparison of Faba bean protein ingredients produced using dry fractionation and isoelectric precipitation: Techno-functional, nutritional and environmental performance. *Foods* **2020**, *9*, doi:10.3390/foods9030322.
24. Opazo-Navarrete, M.; Schutyser, M.A.I.; Boom, R.M.; Janssen, A.E.M. Effect of pre-treatment on in vitro gastric digestion of quinoa protein (*Chenopodium quinoa* Willd.) obtained by wet and dry fractionation. *International Journal of Food Sciences and Nutrition* **2018**, *69*, 1-11, doi:10.1080/09637486.2017.1332171.
25. Çabuk, B.; Nosworthy, M.G.; Stone, A.K.; Korber, D.R.; Tanaka, T.; House, J.D.; Nickerson, M.T. Effect of fermentation on the protein digestibility and levels of non-nutritive compounds of pea protein concentrate. *Food Technology and Biotechnology* **2018**, *56*, 257-264, doi:10.17113/ftb.56.02.18.5450.
26. Huang, J.; Liu, Z.; Rui, X.; L'Hocine, L.; Zhang, Q.; Li, W.; Dong, M. Assessment of the effect of lactic acid fermentation on the gastroduodenal digestibility and immunoglobulin e binding capacity of soy proteins: Via an in vitro dynamic gastrointestinal digestion model. *Food and Function* **2020**, *11*, 10467-10479, doi:10.1039/d0fo02023k.
27. Martínez-Velasco, A.; Lobato-Calleros, C.; Hernández-Rodríguez, B.E.; Román-Guerrero, A.; Alvarez-Ramirez, J.; Vernon-Carter, E.J. High intensity ultrasound treatment of faba bean (*Vicia faba* L.) protein: Effect on surface properties, foaming ability and structural changes. *Ultrasonics Sonochemistry* **2018**, *44*, 97-105, doi:10.1016/j.ultsonch.2018.02.007.
28. Ge, S.J.; Zhang, L.X. Predigestion of soybean proteins with immobilized trypsin for infant formula. *Applied Biochemistry and Biotechnology* **1993**, *43*, 199-209, doi:10.1007/bf02916453.
29. Nguyen, T.T.P.; Bhandari, B.; Cichero, J.; Prakash, S. In vitro digestion of infant formulations with hydrolysed and non-hydrolysed proteins from dairy and soybean. *Food and Function* **2016**, *7*, 4908-4919, doi:10.1039/c6fo01240j.
30. Kaur, L.; Rutherford, S.M.; Moughan, P.J.; Drummond, L.; Boland, M.J. Actinidin enhances protein digestion in the small intestine as assessed using an in vitro digestion model. *Journal of Agricultural and Food Chemistry* **2010**, *58*, 5074-5080, doi:10.1021/jf903835g.
31. Rutherford, S.M.; Montoya, C.A.; Zou, M.L.; Moughan, P.J.; Drummond, L.N.; Boland, M.J. Effect of actinidin from kiwifruit (*Actinidia deliciosa* cv. Hayward) on the digestion of food proteins determined in the growing rat. *Food Chemistry* **2011**, *129*, 1681-1689, doi:10.1016/j.foodchem.2011.06.031.
32. Montoya, C.A.; Hindmarsh, J.P.; Gonzalez, L.; Boland, M.J.; Moughan, P.J.; Rutherford, S.M. Dietary actinidin from kiwifruit (*Actinidia deliciosa* cv. Hayward) increases gastric digestion and the gastric emptying rate of several dietary proteins in growing rats. *Journal of Nutrition* **2014**, *144*, 440-446, doi:10.3945/jn.113.185744.
33. Aryee, A.N.A.; Boye, J.I. Improving the Digestibility of Lentil Flours and Protein Isolate and Characterization of Their Enzymatically Prepared Hydrolysates. *International Journal of Food Properties* **2016**, *19*, 2649-2665, doi:10.1080/10942912.2015.1123269.



34. Fleddermann, M.; Fechner, A.; Rößler, A.; Bähr, M.; Pastor, A.; Liebert, F.; Jahreis, G. Nutritional evaluation of rapeseed protein compared to soy protein for quality, plasma amino acids, and nitrogen balance - A randomized cross-over intervention study in humans. *Clinical Nutrition* **2013**, *32*, 519-526, doi:10.1016/j.clnu.2012.11.005.
35. Singh, T.P.; Siddiqi, R.A.; Sogi, D.S. Enzymatic modification of rice bran protein: Impact on structural, antioxidant and functional properties. *LWT* **2021**, *138*, doi:10.1016/j.lwt.2020.110648.
36. Clemente, A.; Vioque, J.; Sánchez-Vioque, R.; Pedroche, J.; Bautista, J.; Millán, F. Protein quality of chickpea (*Cicer arietinum* L.) protein hydrolysates. *Food Chemistry* **1999**, *67*, 269-274, doi:10.1016/s0308-8146(99)00130-2.
37. Goertzen, A.D.; House, J.D.; Nickerson, M.T.; Tanaka, T. The impact of enzymatic hydrolysis using three enzymes on the nutritional properties of a chickpea protein isolate. *Cereal Chemistry* **2021**, *98*, 275-284, doi:10.1002/cche.10361.
38. Tian, T.; Teng, F.; Zhang, S.; Qi, B.; Wu, C.; Zhou, Y.; Li, L.; Wang, Z.; Li, Y. A Study of Structural Change During In Vitro Digestion of Heated Soy Protein Isolates. *Foods (Basel, Switzerland)* **2019**, *8*, 594, doi:10.3390/foods8120594.
39. Chen, F.P.; Li, B.S.; Tang, C.H. Nanocomplexation between Curcumin and Soy Protein Isolate: Influence on Curcumin Stability/Bioaccessibility and in Vitro Protein Digestibility. *Journal of Agricultural and Food Chemistry* **2015**, *63*, 3559-3569, doi:10.1021/acs.jafc.5b00448.
40. Ren, C.; Xiong, W.; Peng, D.; He, Y.; Zhou, P.; Li, J.; Li, B. Effects of thermal sterilization on soy protein isolate/polyphenol complexes: Aspects of structure, in vitro digestibility and antioxidant activity. *Food Research International* **2018**, *112*, 284-290, doi:10.1016/j.foodres.2018.06.034.
41. Zhang, Y.; Chen, S.; Qi, B.; Sui, X.; Jiang, L. Complexation of thermally-denatured soybean protein isolate with anthocyanins and its effect on the protein structure and in vitro digestibility. *Food Research International* **2018**, *106*, 619-625, doi:10.1016/j.foodres.2018.01.040.
42. Kim, Y.A.; Barbeau, W.E. Changes in the nutritive value of soy protein concentrate during autoclaving. *Plant Foods for Human Nutrition* **1991**, *41*, 179-192, doi:10.1007/bf02194086.
43. Sathe, S.K.; Deshpande, S.S.; Salunkhe, D.K. Functional Properties of Lupin Seed (*Lupinus mutabilis*) Proteins and Protein Concentrates. *Journal of Food Science* **1982**, *47*, 491-497, doi:10.1111/j.1365-2621.1982.tb10110.x.
44. Sathe, S.K.; Deshpande, S.S.; Salunkhe, D.K. Functional Properties of Winged Bean [*Psophocarpus tetragonolobus* (L.) DC] Proteins. *Journal of Food Science* **1982**, *47*, 503-509, doi:10.1111/j.1365-2621.1982.tb10112.x.
45. Tang, C.H.; Chen, L.; Ma, C.Y. Thermal aggregation, amino acid composition and in vitro digestibility of vicilin-rich protein isolates from three Phaseolus legumes: A comparative study. *Food Chemistry* **2009**, *113*, 957-963, doi:10.1016/j.foodchem.2008.08.038.
46. Rivera del Rio, A.; Opazo-Navarrete, M.; Cepero-Betancourt, Y.; Tabilo-Munizaga, G.; Boom, R.M.; Janssen, A.E.M. Heat-induced changes in microstructure of spray-dried plant protein isolates and its implications on in vitro gastric digestion. *LWT* **2020**, *118*, doi:10.1016/j.lwt.2019.108795.
47. Opazo-Navarrete, M.; Tagle Freire, D.; Boom, R.M.; Janssen, A.E.M. The Influence of Starch and Fibre on In Vitro Protein Digestibility of Dry Fractionated Quinoa Seed (Riobamba Variety). *Food Biophysics* **2019**, *14*, 49-59, doi:10.1007/s11483-018-9556-1.
48. Pelgrom, P.J.; Berghout, J.A.; van der Goot, A.J.; Boom, R.M.; Schutyser, M.A. Preparation of functional lupine protein fractions by dry separation. *LWT-Food Science and Technology* **2014**, *59*, 680-688, doi:10.1016/j.lwt.2014.06.007.
49. Sathe, S.K.; Iyer, V.; Salunkhe, D.K. Functional Properties of the Great Northern Bean (*Phaseolus Vulgaris* L.) Proteins. Amino Acid Composition, In Vitro Digestibility, and Application to Cookies. *Journal of Food Science* **1982**, *47*, 8-11, doi:10.1111/j.1365-2621.1982.tb11014.x.
50. Sun, M.; Mu, T.; Zhang, M.; Arogundade, L.A. Nutritional assessment and effects of heat processing on digestibility of Chinese sweet potato protein. *Journal of Food Composition and Analysis* **2012**, *26*, 104-110, doi:10.1016/j.jfca.2012.03.008.
51. Neves, V.A.; Lourenço, E.J. Isolation and in vitro hydrolysis of globulin G1 from lentils (*lens culinaris*, medik). *Journal of Food Biochemistry* **1995**, *19*, 109-120, doi:10.1111/j.1745-4514.1995.tb00525.x.
52. Tavano, O.L.; Neves, V.A. Isolation, solubility and in vitro hydrolysis of chickpea vicilin-like protein. *LWT - Food Science and Technology* **2008**, *41*, 1244-1251, doi:10.1016/j.lwt.2007.08.003.
53. Carbonaro, M.; Grant, G.; Cappelloni, M. Heat-induced denaturation impairs digestibility of legume (*Phaseolus vulgaris* L and *Vicia faba* L) 7S and 11S globulins in the small intestine of rat. *Journal of the Science of Food and Agriculture* **2005**, *85*, 65-72, doi:10.1002/jsfa.1940.
54. Chang, K.C.; Satterlee, L.D. Isolation and Characterization of the Major Protein from Great Northern Beans (*Phaseolus vulgaris*). *Journal of Food Science* **1981**, *46*, 1368-1373, doi:10.1111/j.1365-2621.1981.tb04177.x.
55. Wu, W.; Hettiarachchy, N.S.; Kalapathy, U.; Williams, W.P. Functional properties and nutritional quality of alkali- and heat-treated soy protein isolate. *Journal of Food Quality* **1999**, *22*, 119-133, doi:10.1111/j.1745-4557.1999.tb00545.x.
56. Savoie, L.; Parent, G.; Galibois, I. Effects of alkali treatment on the in-vitro digestibility of proteins and the release of amino acids. *Journal of the Science of Food and Agriculture* **1991**, *56*, 363-372, doi:10.1002/jsfa.2740560312.
57. Sarwar, G.; L'Abbé, M.R.; Trick, K.; Botting, H.G.; Ma, C.Y. Influence of feeding alkaline/heat processed proteins on growth and protein and mineral status of rats. *Advances in Experimental Medicine and Biology* **1999**, *459*, 161-177, doi:10.1007/978-1-4615-4853-9\_11.
58. Laguna, L.; Picouet, P.; Guàrdia, M.D.; Renard, C.M.G.C.; Sarkar, A. In vitro gastrointestinal digestion of pea protein isolate as a function of pH, food matrices, autoclaving, high-pressure and re-heat treatments. *LWT - Food Science and Technology* **2017**, *84*, 511-519, doi:10.1016/j.lwt.2017.06.021.
59. Yin, S.-W.; Tang, C.-H.; Wen, Q.-B.; Yang, X.-Q.; Li, L. Functional properties and in vitro trypsin digestibility of red kidney bean (*Phaseolus vulgaris* L.) protein isolate: Effect of high-pressure treatment. *Food Chemistry* **2008**, *110*, 938-945, doi:10.1016/j.foodchem.2008.02.090.
60. Mariniello, L.; Giosafatto, C.V.L.; Di Pierro, P.; Sorrentino, A.; Porta, R. Synthesis and Resistance to in Vitro Proteolysis of Transglutaminase Cross-Linked Phaseolin, the Major Storage Protein from *Phaseolus vulgaris*. *Journal of Agricultural and Food Chemistry* **2007**, *55*, 4717-4721, doi:10.1021/jf0637269.
61. Tang, C.H.; Li, L.; Yang, X.Q. Influence of transglutaminase-induced cross-linking on in vitro digestibility of soy protein isolate. *Journal of Food Biochemistry* **2006**, *30*, 718-731, doi:10.1111/j.1745-4514.2006.00092.x.
62. Tang, C.-H.; Sun, X.; Yin, S.-W.; Ma, C.-Y. Transglutaminase-induced cross-linking of vicilin-rich kidney protein isolate: Influence on the functional properties and in vitro digestibility. *Food Research International* **2008**, *41*, 941-947, doi:10.1016/j.foodres.2008.07.015.
63. Li, Y.; Damodaran, S. In vitro digestibility and IgE reactivity of enzymatically cross-linked heterologous protein polymers. *Food Chemistry* **2017**, *221*, 1151-1157, doi:10.1016/j.foodchem.2016.11.044.

64. Sheng, W.W.; Zhao, X.H. Functional properties of a cross-linked soy protein-gelatin composite towards limited tryptic digestion of two extents. *Journal of the Science of Food and Agriculture* **2013**, *93*, 3785-3791, doi:10.1002/jsfa.6276.
65. Fu, M.; Zhao, X.H. Modified properties of a glycosylated and cross-linked soy protein isolate by transglutaminase and an oligochitosan of 5 kDa. *Journal of the Science of Food and Agriculture* **2017**, *97*, 58-64, doi:10.1002/jsfa.7682.
66. Zhu, C.Y.; Liu, H.F.; Fu, M.; Zhao, X.H. Structure and property changes of soybean protein isolates resulted from the glycation and cross-linking by transglutaminase and a degraded chitosan. *CYTA - Journal of Food* **2016**, *14*, 138-144, doi:10.1080/19476337.2015.1067646.
67. Gan, C.Y.; Cheng, L.H.; Azahari, B.; Easa, A.M. In-vitro digestibility and amino acid composition of soy protein isolate cross-linked with microbial transglutaminase followed by heating with ribose. *International Journal of Food Sciences and Nutrition* **2009**, *60*, 99-108, doi:10.1080/09637480802635090.
68. Yin, S.W.; Tang, C.H.; Wen, Q.B.; Yang, X.Q. Effects of acylation on the functional properties and in vitro trypsin digestibility of red kidney bean (*Phaseolus vulgaris* L.) protein isolate. *Journal of Food Science* **2009**, *74*, E488-E494, doi:10.1111/j.1750-3841.2009.01349.x.
69. El-Adawy, T.A. Functional properties and nutritional quality of acetylated and succinylated mung bean protein isolate. *Food Chemistry* **2000**, *70*, 83-91, doi:10.1016/s0308-8146(00)00079-0.
70. Achouri, A.; Zhang, W. Effect of succinylation on the physicochemical properties of soy protein hydrolysate. *Food Research International* **2001**, *34*, 507-514, doi:10.1016/s0963-9969(01)00063-1.
71. de Regil, L.M.; Calderón de la Barca, A.M. Nutritional and technological evaluation of an enzymatically methionine-enriched soy protein for infant enteral formulas. *International Journal of Food Sciences and Nutrition* **2004**, *55*, 91-99, doi:10.1080/09637480410001666478.
72. Budryn, G.; Zaczynska, D.; Rachwał-Rosiak, D.; Oracz, J. Changes in properties of food proteins after interaction with free and  $\beta$ -cyclodextrin encapsulated hydroxycinnamic acids. *European Food Research and Technology* **2015**, *240*, 1157-1166, doi:10.1007/s00217-015-2419-9.
73. Rohn, S.; Petzke, K.J.; Rawel, H.M.; Kroll, J. Reactions of chlorogenic acid and quercetin with a soy protein isolate - Influence on the in vivo food protein quality in rats. *Molecular Nutrition and Food Research* **2006**, *50*, 696-704, doi:10.1002/mnfr.200600043.
74. Strauch, R.C.; Lila, M.A. Pea protein isolate characteristics modulate functional properties of pea protein-cranberry polyphenol particles. *Food Science and Nutrition* **2021**, *9*, 3740-3751, doi:10.1002/fsn3.2335.
75. Yang, J.; Bao, Z.; Wu, N.; Yang, X.; Lin, W.; Chen, Z.; Wang, J.; Guo, J. Preparation and characterisation of soya milk enriched with isoflavone aglycone fermented by lactic acid bacteria combined with hydrothermal cooking pretreatment. *International Journal of Food Science and Technology* **2015**, *50*, 1331-1337, doi:10.1111/ijfs.12784.
76. Chen, N.; Zhao, Q.; Sun, W.; Zhao, M. Effects of malondialdehyde modification on the in vitro digestibility of soy protein isolate. *Journal of Agricultural and Food Chemistry* **2013**, *61*, 12139-12145, doi:10.1021/jf404099y.
77. Rhee, K.S.; Rhee, K.C. Nutritional Evaluation of the Protein in Oilseed Products Heated with Sugars. *Journal of Food Science* **1981**, *46*, 164-168, doi:10.1111/j.1365-2621.1981.tb14555.x.
78. Wang, H.; Chen, Y.; Hua, Y.; Kong, X.; Zhang, C. Effects of phytase-assisted processing method on physicochemical and functional properties of soy protein isolate. *Journal of Agricultural and Food Chemistry* **2014**, *62*, 10989-10997, doi:10.1021/jf503952s.
79. Zhao, J.; Su, G.; Chen, C.; Sun, X.; Sun, W.; Zhao, M. Physicochemical and Structural Characteristics of Soybean Protein Isolates Induced by Lipoxigenase-Catalyzed Linoleic Acid Oxidation during In Vitro Gastric Digestion. *Journal of Agricultural and Food Chemistry* **2020**, *68*, 12384-12392, doi:10.1021/acs.jafc.0c02098.
80. Chen, N.; Zhao, M.; Sun, W. Effect of protein oxidation on the in vitro digestibility of soy protein isolate. *Food Chemistry* **2013**, *141*, 3224-3229, doi:10.1016/j.foodchem.2013.05.113.
81. Duque-Estrada, P.; Berton-Carabin, C.C.; Nieuwkoop, M.; Dekkers, B.L.; Janssen, A.E.M.; van der Goot, A.J. Protein Oxidation and In Vitro Gastric Digestion of Processed Soy-Based Matrices. *Journal of Agricultural and Food Chemistry* **2019**, *67*, 9591-9600, doi:10.1021/acs.jafc.9b02423.
82. Opazo-Navarrete, M.; Altenburg, M.D.; Boom, R.M.; Janssen, A.E.M. The Effect of Gel Microstructure on Simulated Gastric Digestion of Protein Gels. *Food Biophysics* **2018**, *13*, 124-138, doi:10.1007/s11483-018-9518-7.
83. Hall, A.E.; Moraru, C.I. Effect of High Pressure Processing and heat treatment on in vitro digestibility and trypsin inhibitor activity in lentil and faba bean protein concentrates. *LWT* **2021**, *152*, doi:10.1016/j.lwt.2021.112342.
84. Rui, X.; Fu, Y.; Zhang, Q.; Li, W.; Zare, F.; Chen, X.; Jiang, M.; Dong, M. A comparison study of bioaccessibility of soy protein gel induced by magnesiumchloride, glucono- $\delta$ -lactone and microbial transglutaminase. *LWT - Food Science and Technology* **2016**, *71*, 234-242, doi:10.1016/j.lwt.2016.03.032.
85. Ou, S.; Kwok, K.C.; Kang, Y. Changes in in vitro digestibility and available lysine of soy protein isolate after formation of film. *Journal of Food Engineering* **2004**, *64*, 301-305, doi:10.1016/j.jfoodeng.2003.10.013.
86. Omosebi, M.O.; Osundahunsi, O.F.; Fagbemi, T.N. Effect of extrusion on protein quality, antinutritional factors, and digestibility of complementary diet from quality protein maize and soybean protein concentrate. *Journal of Food Biochemistry* **2018**, *42*, doi:10.1111/jfbc.12508.
87. Wang, N.; Bhirud, P.R.; Tyler, R.T. Extrusion texturization of air-classified pea protein. *Journal of Food Science* **1999**, *64*, 509-513, doi:10.1111/j.1365-2621.1999.tb15073.x.
88. Li, S.; Jiang, Z.; Wang, F.; Wu, J.; Liu, Y.; Li, X. Characterization of rice glutelin fibrils and their effect on in vitro rice starch digestibility. *Food Hydrocolloids* **2020**, *106*, 105918, doi:10.1016/j.foodhyd.2020.105918.
89. Hu, B.; Chen, Q.; Cai, Q.; Fan, Y.; Wilde, P.J.; Rong, Z.; Zeng, X. Gelation of soybean protein and polysaccharides delays digestion. *Food Chemistry* **2017**, *221*, 1598-1605, doi:10.1016/j.foodchem.2016.10.132.
90. Huang, Z.; Gruen, I.; Vardhanabhuti, B. Intragastric Gelation of Heated Soy Protein Isolate-Alginate Mixtures and Its Effect on Sucrose Release. *Journal of Food Science* **2018**, *83*, 1839-1846, doi:10.1111/1750-3841.14192.
91. Khalesi, M.; Fitzgerald, R.J. In vitro digestibility and antioxidant activity of plant protein isolate and milk protein concentrate blends. *Catalysts* **2021**, *11*, doi:10.3390/catal11070787.
92. Baugreet, S.; Gomez, C.; Auty, M.A.E.; Kerry, J.P.; Hamill, R.M.; Brodkorb, A. In vitro digestion of protein-enriched restructured beef steaks with pea protein isolate, rice protein and lentil flour following sous vide processing. *Innovative Food Science and Emerging Technologies* **2019**, *54*, 152-161, doi:10.1016/j.ifset.2019.04.005.

93. Oñate Narciso, J.; Brennan, C. Whey and Pea Protein Fortification of Rice Starches: Effects on Protein and Starch Digestibility and Starch Pasting Properties. *Starch/Stärke* **2018**, *70*, doi:10.1002/star.201700315.
94. Sánchez-Vioque, R.; Vioque, J.; Clemente, A.; Pedroche, J.; Bautista, J.; Millán, F. Interaction of chickpea (*Cicer arietinum* L.) legumin with oxidized linoleic acid. *Journal of Agricultural and Food Chemistry* **1999**, *47*, 813-818, doi:10.1021/jf980889r.
95. Hsu, H.; Vavak, D.; Satterlee, L.; Miller, G. A multienzyme technique for estimating protein digestibility. *Journal of Food Science* **1977**, *42*, 1269-1273, doi:10.1111/j.1365-2621.1977.tb14476.x.
